# Supplementary material for: Interplay of Fli-I and FLAP1 for regulation of β-catenin dependent transcription
Source: PubMed Central journal article supplement — Nucleic Acids Res. 2006 Sep 20;34(18):5052–9. doi: 10.1093/nar/gkl652 (PMC1636430; doi:10.1093/nar/gkl652), 2006-09-20

## Supplementary materials

**Supplementary Figure 6.** Interaction of FLAP1 with ER and p300. **(A)** GST fusion proteins analyzed by Coomassie blue staining: GST fusion proteins were analyzed by SDS-PAGE and Coomassie blue staining. Full size GST fusion proteins are indicated by dots on the left side of the stained band. **(B & C)** GST-pulldown assays: in vitro translated Flag-FLAP1 was incubated with the indicated GST fusion proteins (approximately 1  $\mu$ g) bound to beads. Bound fractions were analyzed by immunoblot with anti-Flag antibodies. **(D)** Mammalian one hybrid assays: GK1-Luc (a Gal4-responsive reporter plasmid), pM-ERAF1 and pM-ERAF2 (0.2  $\mu$ g of each as indicated, encoding the N-terminal activation domain of ER or the C-terminal ligand binding domain of ER fused to Gal4 DBD) were transfected along with 0.2  $\mu$ g of pCMV-FLAP1 and pCMV-p300 vectors. For pM-ERAF2 (assays 5-8), 100  $\mu$ M estradiol was included after transfection. **(E)** FLAP1 but not Fli-I LRR fragment binds to p300 KIX domain: GST pull down assays were performed as described above, using in vitro translated Flag-FLAP1 or Flag-LRR and GST-KIX. **(F)** Competition assay: in vitro translated FLAP1 protein was incubated with purified GST-KIX protein in the presence of in vitro translated LRR and Gelsolin fragments of Fli-I, as indicated. The relative in vitro translation efficiency of FLAP1 and LRR is shown in E; in vitro translation efficiency of the Gelsolin-like fragment was similar to that of LRR (data not shown). Five times excess amounts of LRR and Gelsolin-like fragments were included as competitors for FLAP1. The GST fusion protein bound fractions were analyzed by immunoblot with anti-FLAP1 antibody.

**Fig.6 (Supplementary figure)**

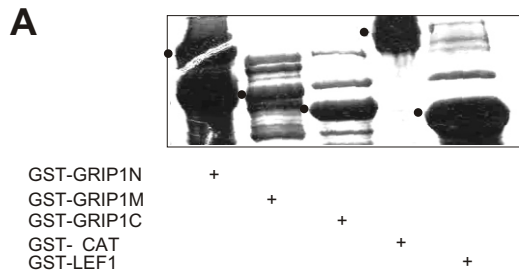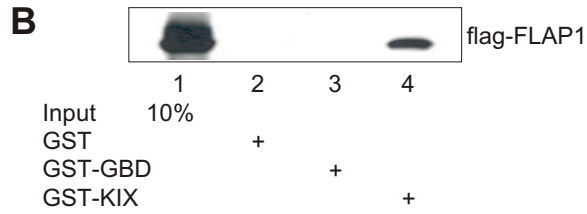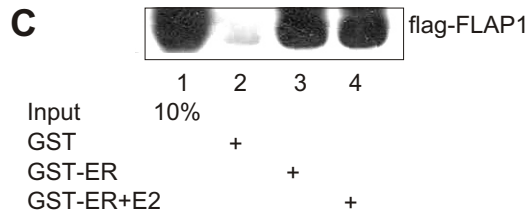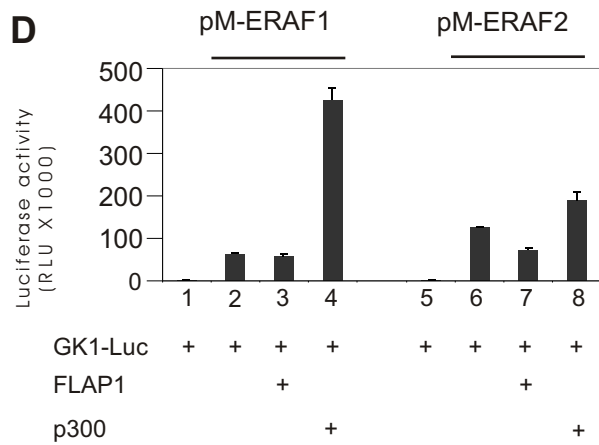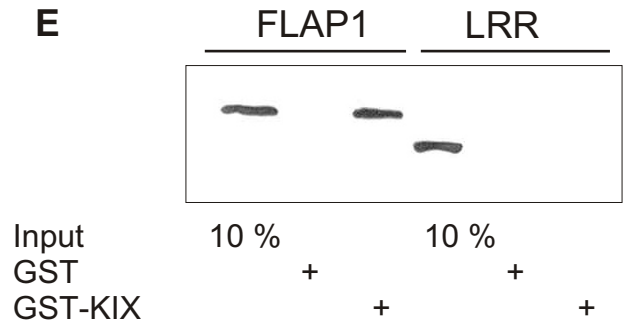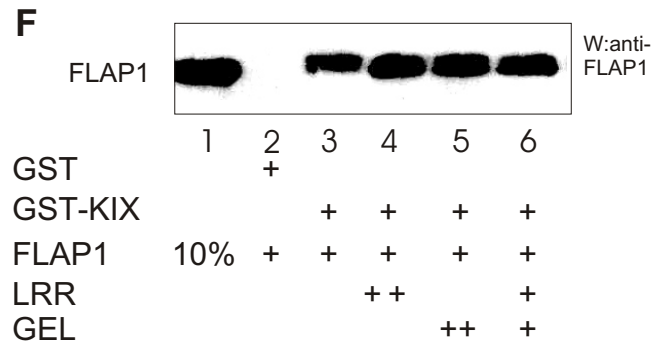

Supplement: nar_gkl652_1.pdf [file nar_gkl652_1.pdf]
